# Supplementary material for: Peroxisomal targeting of a protein phosphatase type 2C via mitochondrial transit
Source: PubMed Central journal article supplement (PMC7217942; doi:10.1038/s41467-020-16146-3), 2020-05-12
Supplement: 41467_2020_16146_MOESM1_ESM.pdf [file 41467_2020_16146_MOESM1_ESM.pdf]

Peroxisomal targeting of a protein phosphatase type 2C via mitochondrial transit

Stehlik, et al.

Supplementary Information

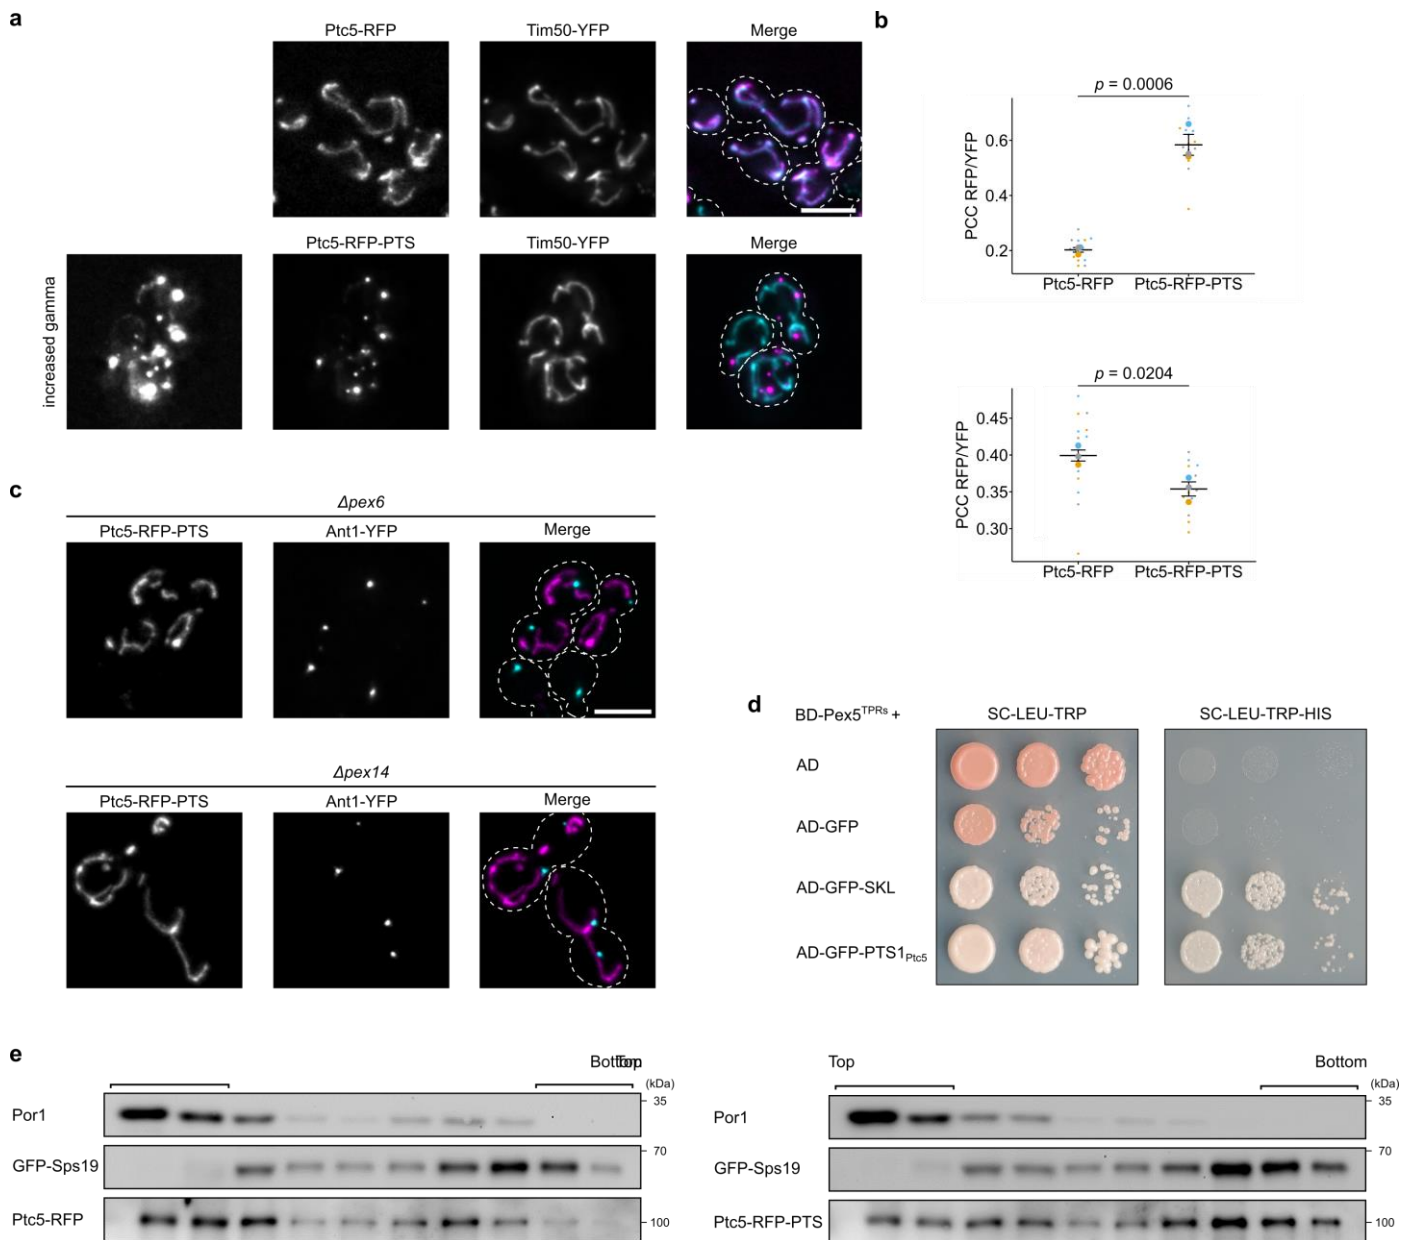

**Supplementary Figure 1. Dual targeting of Ptc5-RFP-PTS to peroxisomes and to mitochondria. (a)** Ptc5-RFP (magenta) or Ptc5-RFP-PTS (magenta) were co-expressed with the mitochondrial protein Tim50-YFP. Subcellular localization was determined by fluorescence microscopy. Image of Ptc5-RFP-PTS is also shown with increased gamma to facilitate visibility of mitochondrial localization. White color indicates colocalization. Scale bar represents 5  $\mu\text{m}$ . **(b)** Correlation of Ptc5-RFP or Ptc5-RFP-PTS with either Ant1-YFP or Tim50-CFP was analyzed. PCC refers to Pearson's correlation coefficient. Quantifications are based on three independent experiment ( $n = 3$ ). Each color represents one experiment. P-values were calculated with two-tailed unpaired Student's  $t$ -tests. **(c)** Ptc5-RFP-PTS was co-expressed with the peroxisomal protein Ant1-YFP in  $\Delta pex6$  and  $\Delta pex14$  mutants. Subcellular localization was determined by fluorescence microscopy. White color indicates colocalization. Scale bar represents 5  $\mu\text{m}$ . **(d)** Yeast two hybrid assay. A fragment including the TPR domains of Pex5 fused to the GAL4-binding domain (BD-Pex5<sup>TPRs</sup>) was co-expressed with the isolated Gal4-activation domain (AD), AD-GFP, AD-GFP-SKL and AD-GFP-PTS<sub>1Ptc5</sub> in strain AH109  $\Delta pex5$ , respectively. Strains were spotted in serial dilutions on SC-LEU-TRP plates to select for plasmids (growth control) and on SC-LEU-TRP-HIS plates to test for physical interaction. **(e)** Complete density gradient centrifugation analysis shown in Fig. 1e. Fractions were collected from the top of the gradient and analyzed by Western blot. Brackets specify lanes shown in Fig. 1e. Source Data are provided in the Source Data file.

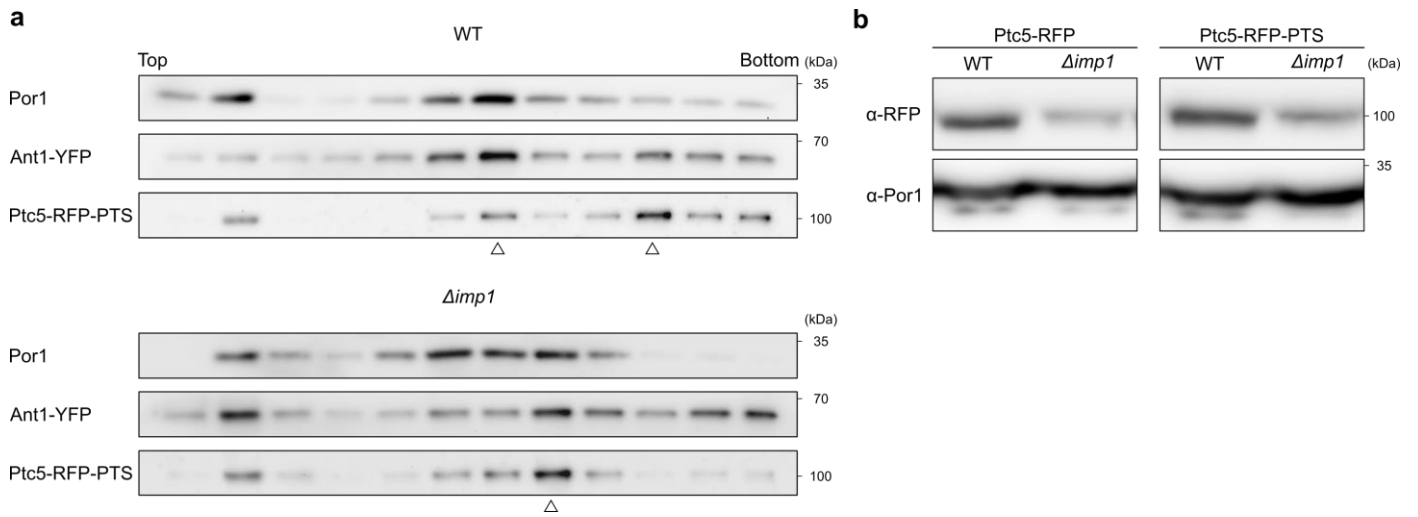

**Supplementary Figure 2. Peroxisomal targeting of Ptc5-RFP-PTS depends on Imp1.** (a) Organelles of WT and *Δimp1* cells expressing Ptc5-RFP-PTS and Ant1-YFP grown in glucose containing medium were prepared and subjected to buoyant density centrifugation on step gradients. Fractions were collected from the top and analyzed by SDS-PAGE and Western blot. Triangles denote fractions analyzed by high resolution SDS-PAGE (Fig. 3b). (b) Expression of Ptc5-RFP and Ptc5-RFP-PTS was analyzed by subjecting whole cell extracts from depicted yeast strains to SDS-PAGE and Western blot. Source Data are provided in the Source Data file.

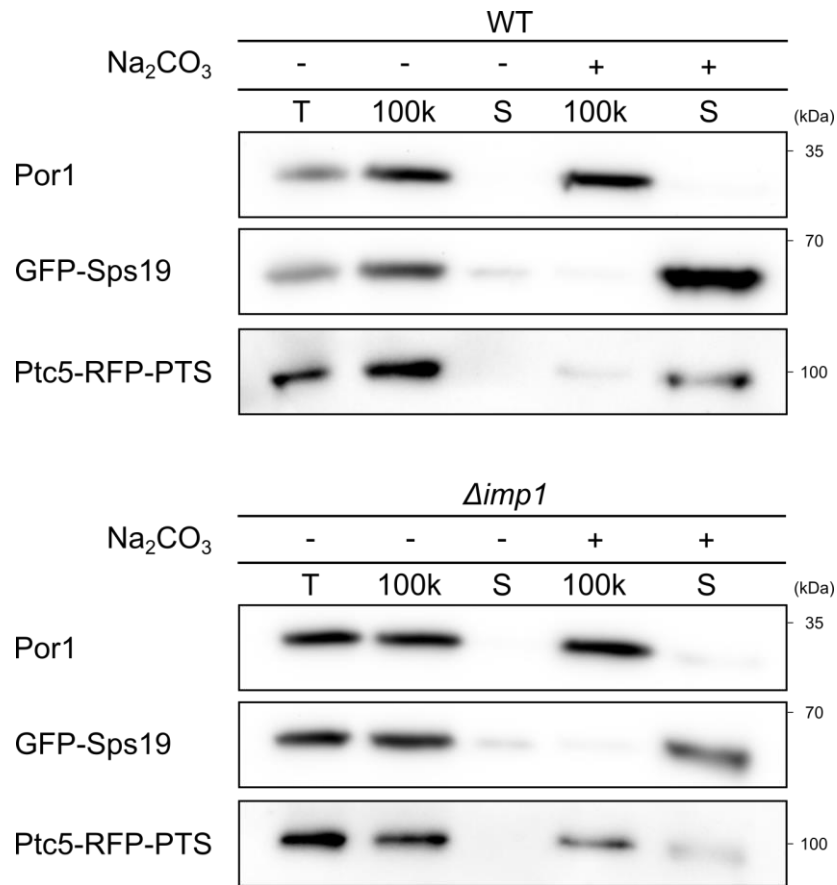

**Supplementary Figure 3. Ptc5-RFP-PTS is soluble inside the peroxisomal matrix.** Crude organelle preparations derived from indicated strains were subjected to Na<sub>2</sub>CO<sub>3</sub> extraction and pelleted at 100.000 x g. Total (T), pellet (100k) and supernatant (S) fractions were analyzed by SDS-PAGE and Western blot. Source Data are provided in the Source Data file.

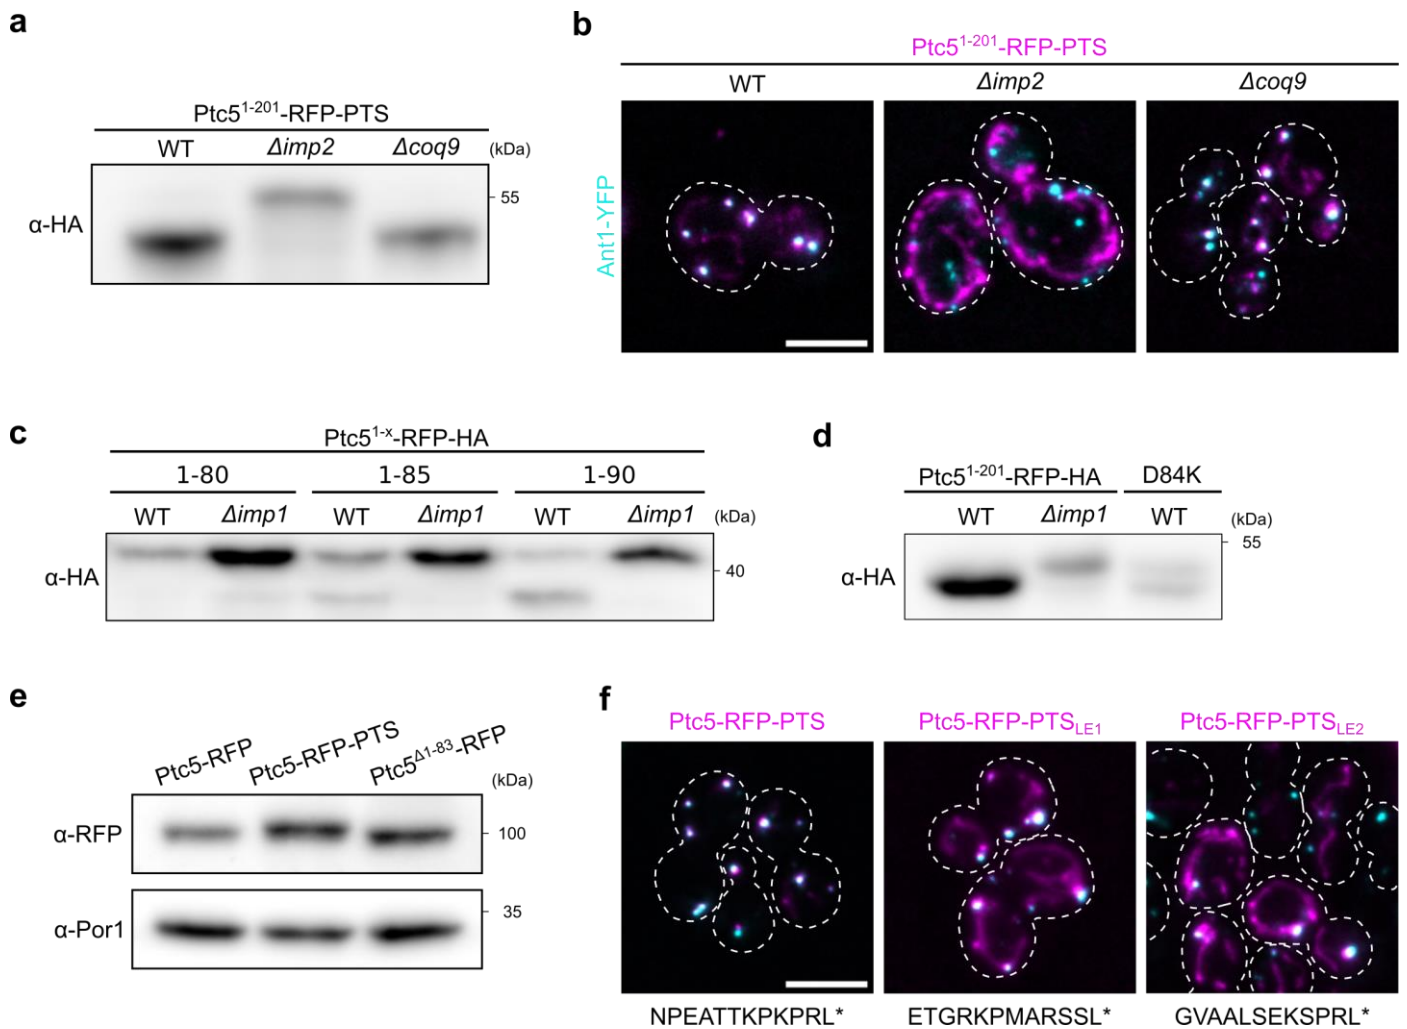

**Supplementary Figure 4. Sorting to peroxisomes requires processing of Ptc5.** (a) Whole cell lysates of indicated yeast strains were subjected to SDS-PAGE and Western blot. (b) Fluorescence microscopic pictures of yeast cells expressing Ptc5<sup>1-201</sup>-RFP-PTS (magenta) and the peroxisomal membrane protein Ant1-YFP (cyan) in indicated strains. White color indicates colocalization. Scale bar represents 5  $\mu$ m. (c) Migration of Ptc5-RFP-HA truncations from WT and  $\Delta imp1$  cells on SDS-PAGE was determined by Western blot of whole cell lysates. (d) Migration of Ptc5<sup>1-201</sup>-RFP-HA compared to Ptc5<sup>1-201</sup>-RFP-HA containing a mutation in the Imp1 cleavage site of Ptc5 (D84K) on SDS-PAGE was examined by Western blot. (e) Expression of Ptc5-RFP, Ptc5-RFP-PTS and Ptc5 $\Delta$ 1-83-RFP was analyzed by subjecting whole cell extracts to SDS-PAGE and Western blot. Por1 served as loading control. (f) Dual targeting of Ptc5-RFP-PTS derivatives with low efficiency (LE) PTS1 motifs was analyzed by fluorescence microscopy and compared to Ptc5-RFP-PTS (left picture). Ant1-YFP (cyan) served as marker for peroxisomes. Sequences of the C-terminal dodecamers containing PTS1 are depicted below representative pictures. White color indicates colocalization. Scale bar represents 5  $\mu$ m. Source Data are provided in the Source Data file.

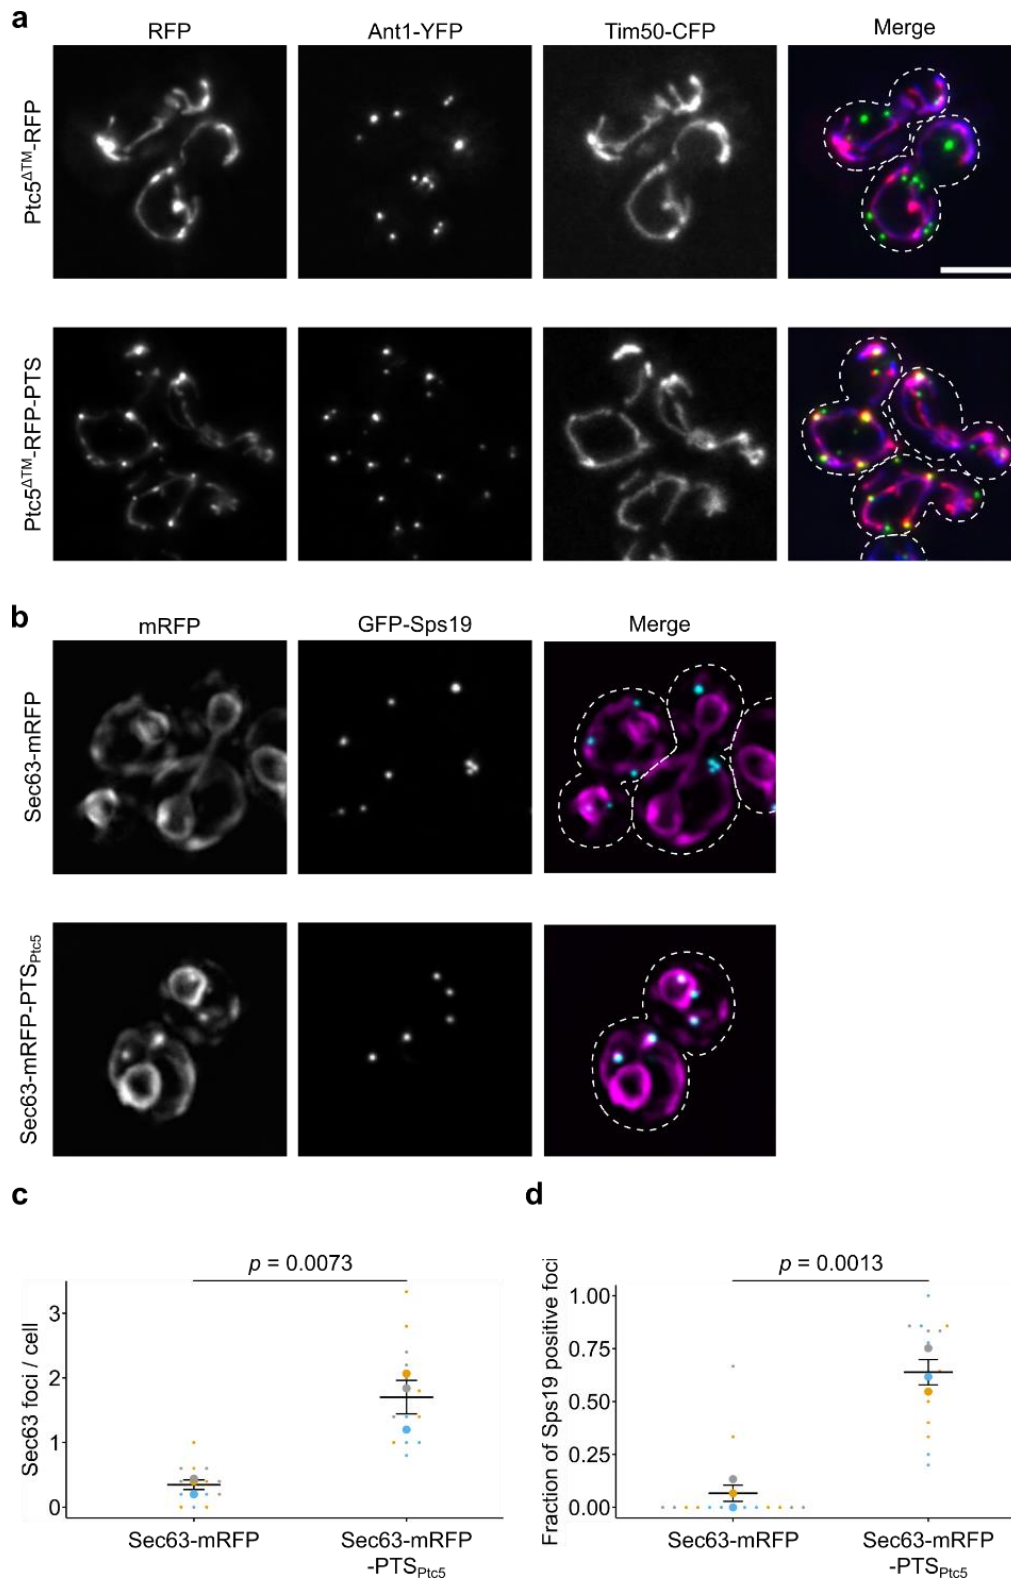

**Supplementary Figure 5. Competing targeting signals increase association of organelles.** (a) Subcellular localization of Ptc5<sup>ΔTM</sup>-RFP (red) and Ptc5<sup>ΔTM</sup>-RFP-PTS was determined using fluorescence microscopy. Ant1-YFP (green) and Tim50-CFP (blue) were used to label peroxisomes and mitochondria, respectively. Both strains were used to quantify association of peroxisomes with mitochondria. Results of this quantification are shown in Fig. 5e. Scale bar represents 5  $\mu$ m. (b) Sec63-mRFP (magenta) and the chimeric variant Sec63-mRFP-PTS<sub>Ptc5</sub> (magenta) were imaged in strains containing GFP-Sps19 (cyan). White color indicates colocalization. Scale bar represents 5  $\mu$ m. (c) The number of mRFP-positive foci per cell from three independent experiments (n = 3) was quantified. Each color represents one experiment. P-value was calculated using a two-tailed unpaired Student's *t* test. (d) The number of mRFP-positive foci decorated with peroxisomes from three independent experiments (n = 3) was quantified. Each color represents one experiment. P-value was calculated using a two-tailed unpaired Student's *t* test. Source Data are provided in the Source Data file.

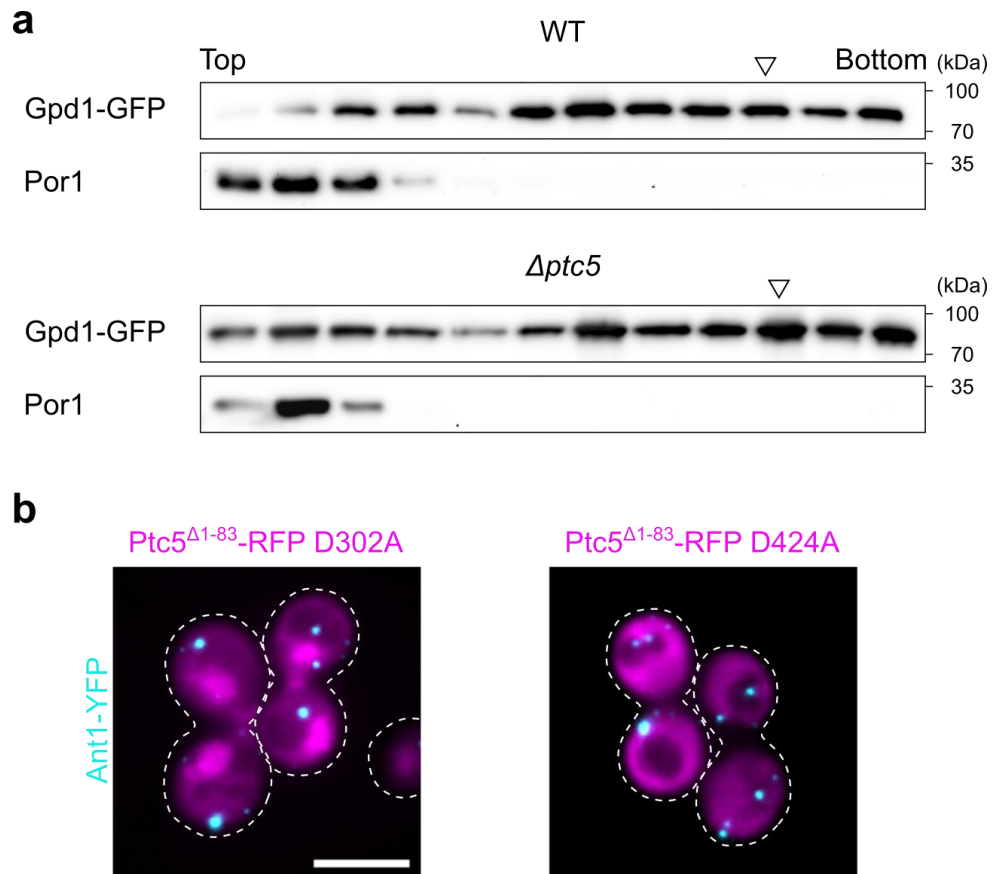

**Supplementary Figure 6. Insights into the biological function of peroxisomal Ptc5 and of its unusual targeting.** (a) Organelle preparations from indicated strains expressing GFP-Gpd1 were first pelleted at 13k x g to remove cytosolic proteins and subjected to buoyant density centrifugation on step gradients. Fractions were analyzed by SDS-PAGE and Western blot. Fractions are ordered from the lowest (Top) to the highest buoyant density (Bottom). Triangles specify fractions analyzed by PhosTag SDS-PAGE shown in Fig. 5f. (b) Fluorescence microscopic pictures of yeast cells expressing the enzymatic dead variants Ptc5 $\Delta$ <sup>1-83</sup>-RFP (D302A) or Ptc5 $\Delta$ <sup>1-83</sup>-RFP (D424A) (magenta) together with the peroxisomal membrane protein Ant1-YFP (cyan). White color indicates colocalization. Scale bar represents 5  $\mu$ m. Source Data are provided in the Source Data file.

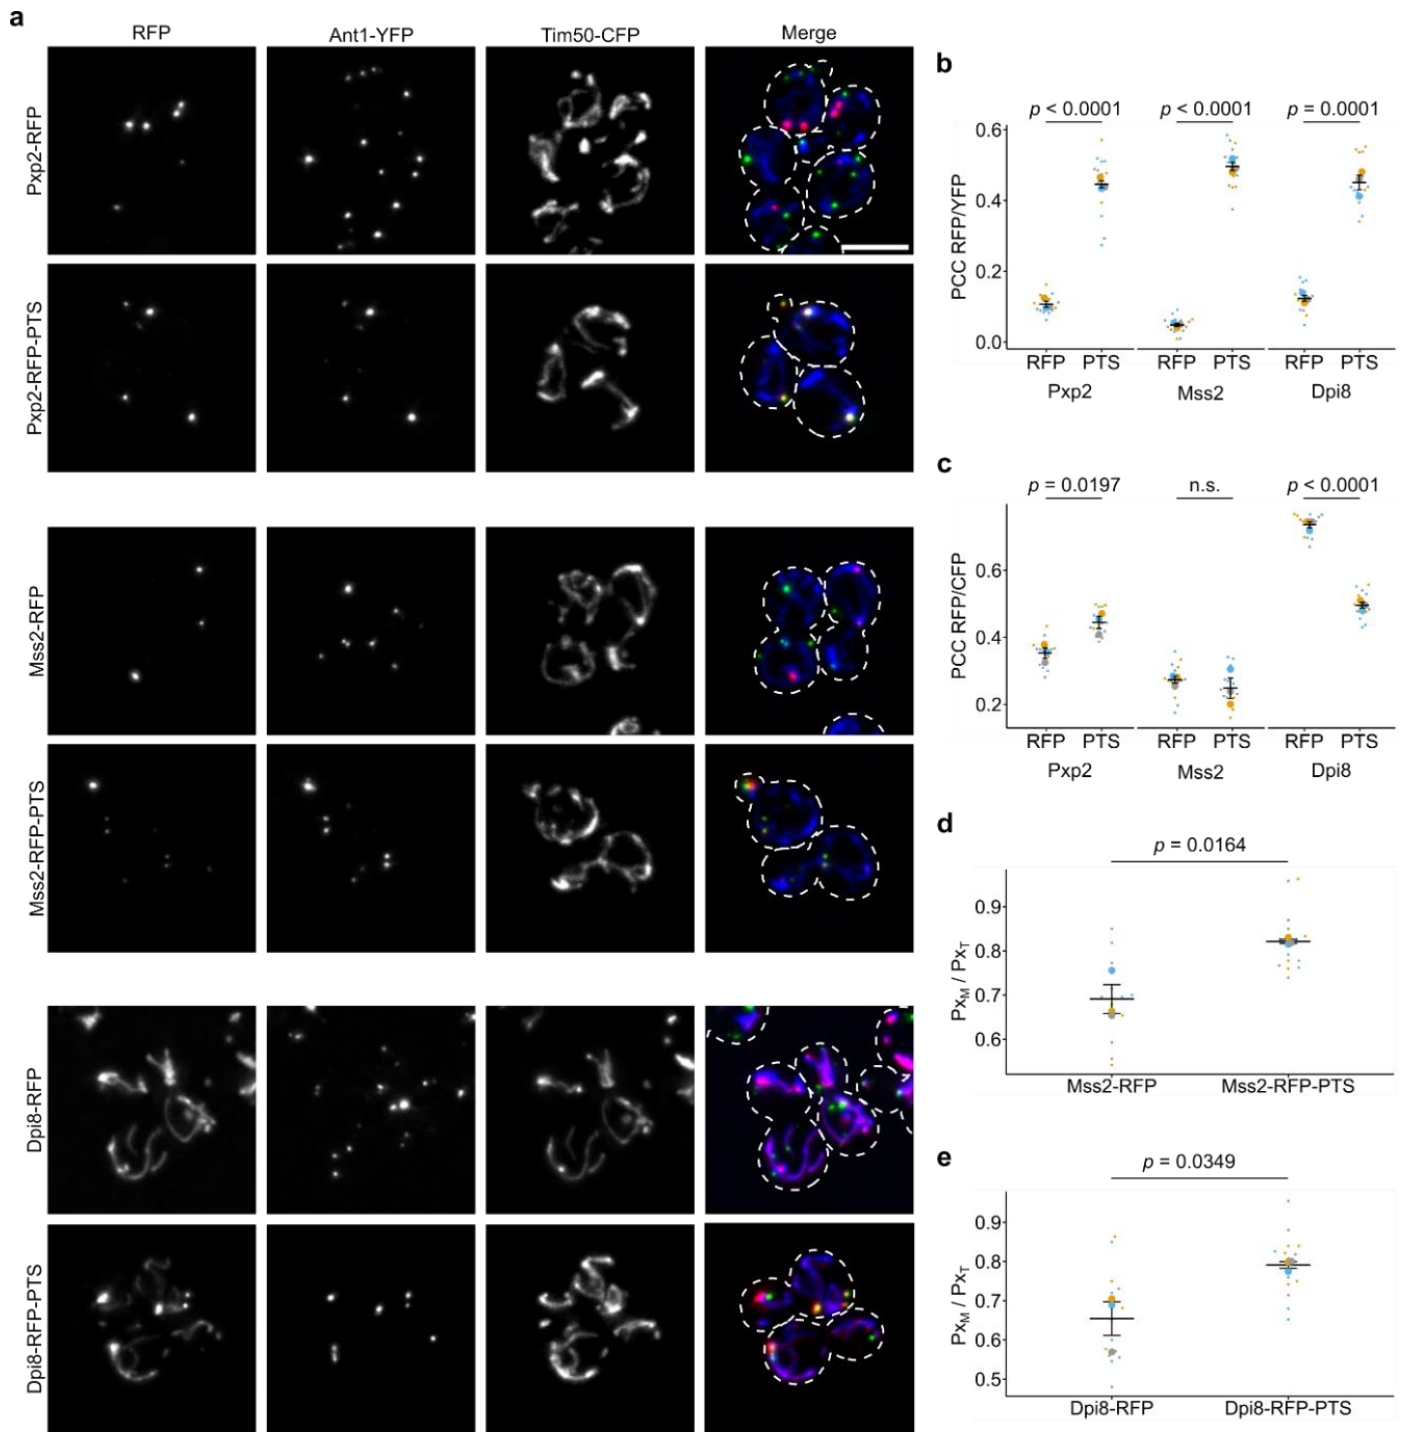

**Supplementary Figure 7. Candidate mitochondrial proteins with C-terminal PTS1. (a)** C-terminally or internally RFP tagged proteins (red) were imaged together with Ant1-YFP (green) and Tim50-CFP (blue). White color indicates colocalization of all three signals. Scale bar represents 5  $\mu\text{m}$ . **(b and c)** Correlation of RFP with YFP or CFP signals was quantified. PCC refers to the Pearson's correlation coefficient. n.s.: not statistically significant. Quantifications from three independent experiments are shown ( $n = 3$ ). Different colors represent different experiments. P-values were calculated using two-tailed unpaired Student's  $t$  tests. **(d)** Quantification of the fraction of peroxisomes contacting mitochondria ( $P_{XM}$ ) in relation to the total peroxisome count ( $P_{XT}$ ) of cells co-expressing Mss2-RFP or Mss2-RFP-PTS with Ant1-YFP and the mitochondrial membrane protein Tim50 fused to CFP. Association of Ant1-YFP containing foci with Tim50-CFP was counted. Quantifications from three independent experiments are shown ( $n = 3$ ). Different  $s$  represents different experiments. P-value was calculated using a two-tailed unpaired Student's  $t$  test. **(e)** Quantification of the fraction of peroxisomes contacting mitochondria ( $P_{XM}$ ) in relation to the total peroxisome count ( $P_{XT}$ ) of cells co-expressing Dpi8-RFP or Dpi8-RFP-PTS with Ant1-YFP and the mitochondrial membrane protein Tim50 fused to CFP. Association of Ant1-YFP containing foci with Tim50-CFP was counted. Quantifications from three independent experiments are



shown ( $n = 3$ ). Colors represent different experiments. P-value was calculated using a two-tailed unpaired Student's  $t$  test. Source Data are provided in the Source Data file. Source Data are provided in the Source Data file.

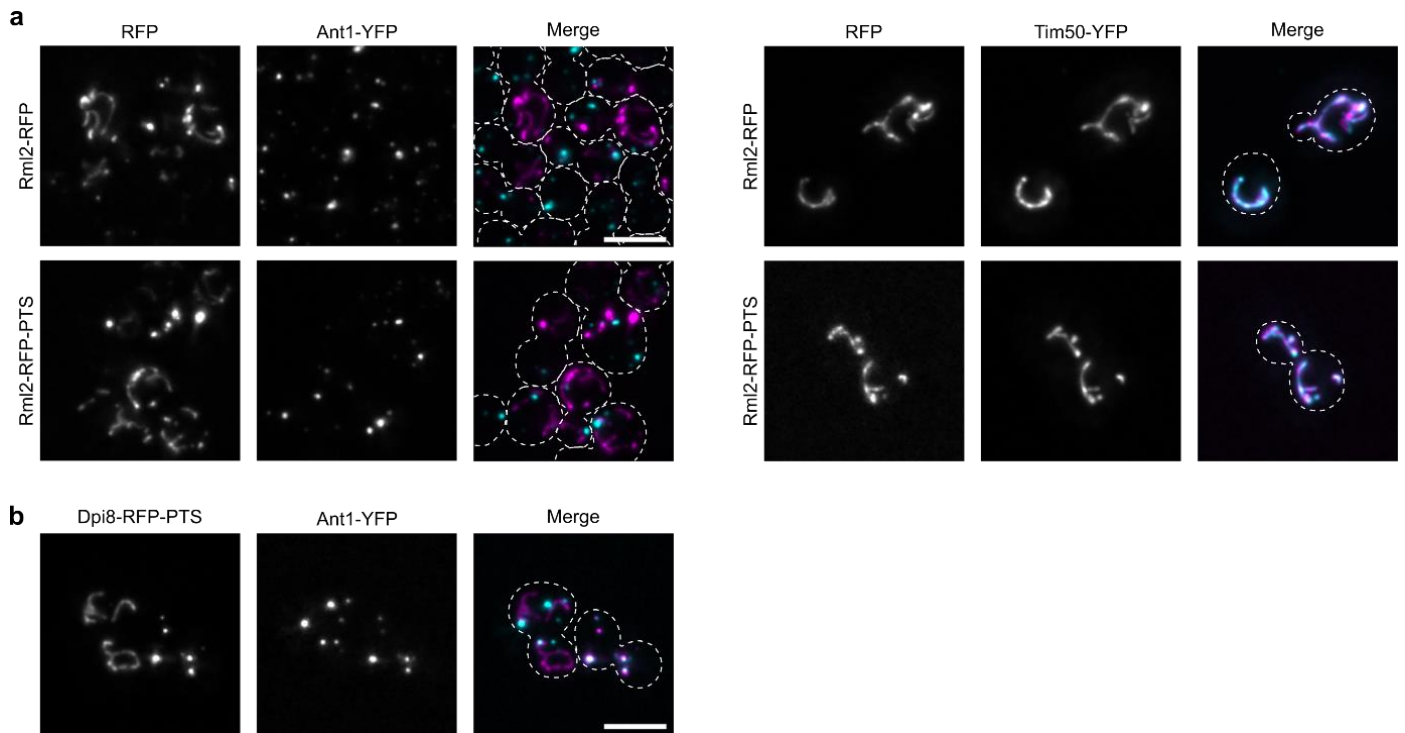

**Supplementary Figure 8. Candidate mitochondrial proteins with C-terminal PTS1.** (a) C-terminally (upper panel) or internally (lower panel) RFP tagged Rml2 (magenta) was imaged together with Ant1-YFP (cyan, left panel) or Tim50-YFP (cyan, right panel). White color indicates colocalization. Scale bar represents 5  $\mu\text{m}$ . (b) Internally RFP tagged Dpi8 (magenta) was imaged together with Ant1-YFP (cyan). Note that Dpi8-RFP-PTS is localized almost entirely to mitochondria in one depicted cell, while it predominantly localizes to peroxisomes in the other cell. This indicates regulation of tug-of-war like sorting.

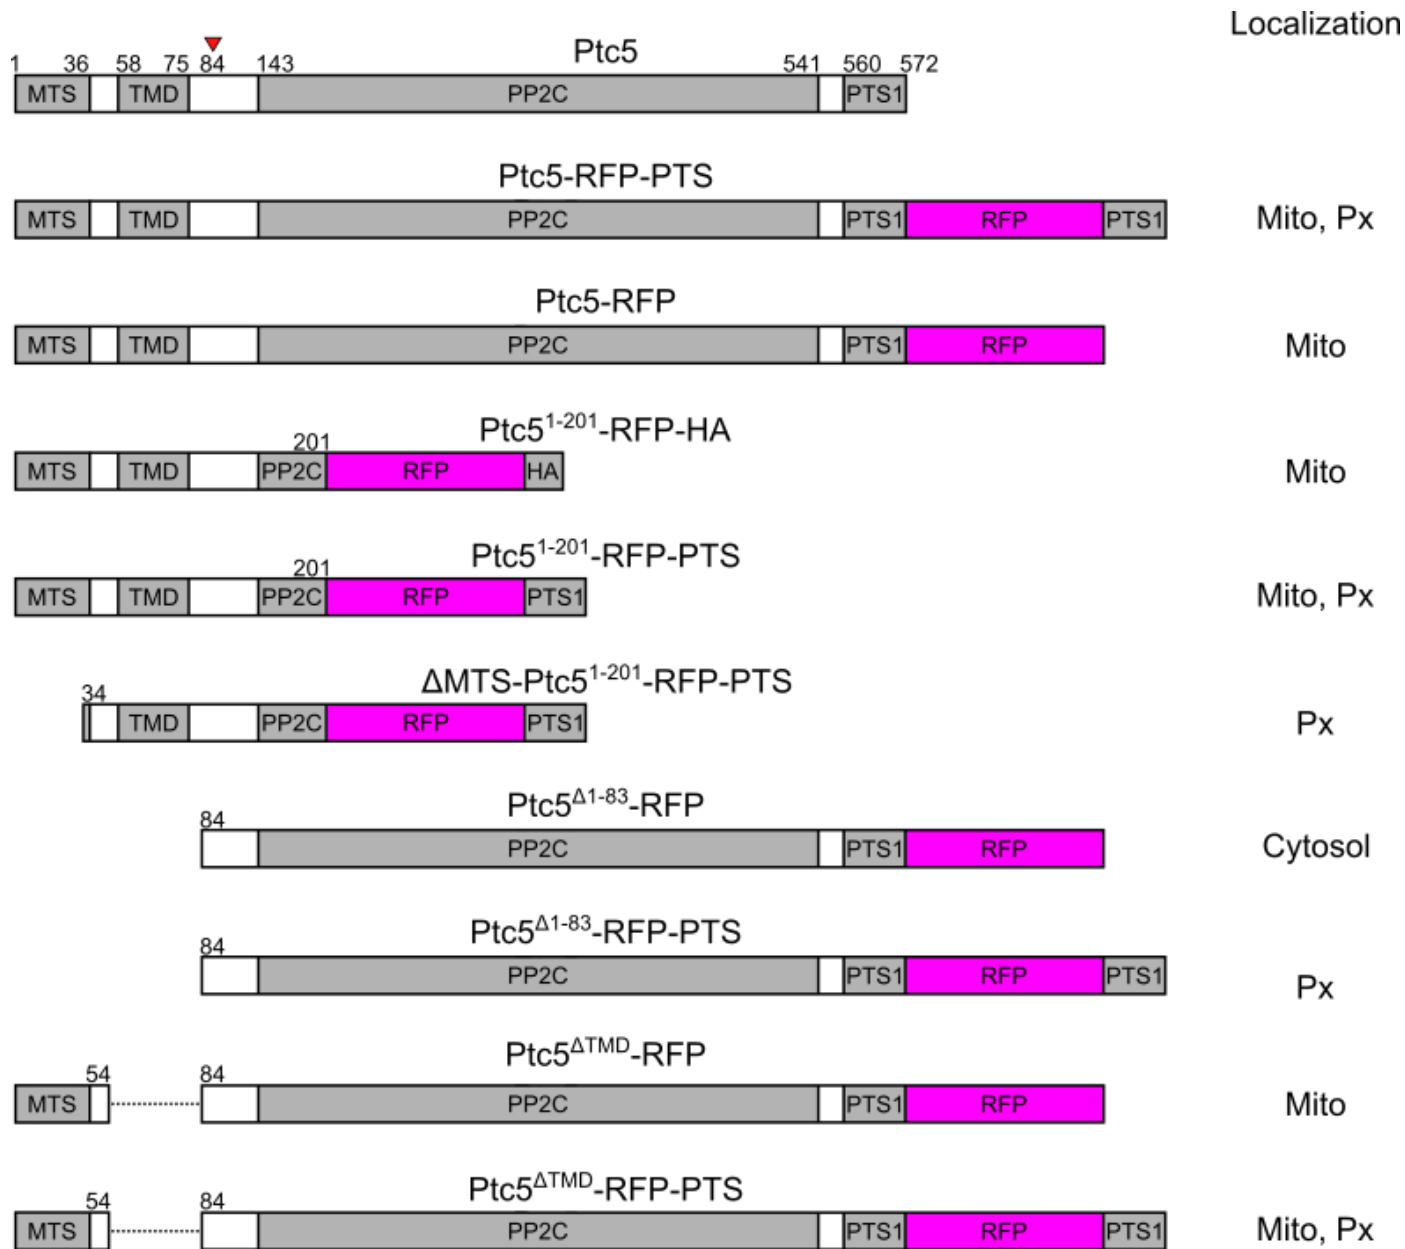

**Supplementary Figure 9. Schematic representation of Ptc5-RFP fusion constructs generated during this study.** The red triangle indicated the Imp cleavage site. The subcellular localization of respective fusion proteins is highlighted.

**Supplementary Table 1. Mitochondrial proteins with PTS1.**

| Standard name | Systematic name <sup>1</sup> | Putative PTS1 <sup>2</sup> | P-Score <sup>3</sup> | Prediction <sup>4</sup> |
|---------------|------------------------------|----------------------------|----------------------|-------------------------|
| CAT2          | YML042W                      | ALENENKRKAKL               | 11.229               | Targeted                |
| PTC5          | YOR090C                      | NPEATTKPKPRL               | 10.411               | Targeted                |
| MRP7          | YNL005C                      | IARSRRFLSKL                | 9.854                | Targeted                |
| TES1          | YJR019C                      | VYGSERDIRAKF               | 9.571                | Targeted                |
| MSS2          | YDL107W                      | KDSIKLLDKARL               | 9.328                | Targeted                |
| CIT2          | YCR005C                      | YKELVKNIESKL               | 9.312                | Targeted                |
| PET309        | YLR067C                      | RKSKRVLPVSKF               | 8.830                | Targeted                |
| LYS4          | YDR234W                      | KGGLEGWVKSQ                | 8.383                | Targeted                |
| NSA1          | YGL111W                      | VAASKASKKSKI               | 7.400                | Targeted                |
| MIC10         | YCL057C-A                    | FRSSAGLRSSKV               | 7.189                | Targeted                |
| LYS12         | YIL094C                      | TQQVDDVLSRL                | 7.008                | Targeted                |
| DPI8          | YJL133C-A                    | ATTRHLAHAPKL               | 6.028                | Targeted                |
| CTA1          | YDR256C                      | KHASELSSNSKF               | 4.375                | Targeted                |
| MRS1          | YIR021W                      | AGSSKFLKGAKI               | 2.750                | Targeted                |
| MRPL37        | YBR268W                      | QRIKQNNFLSQL               | 1.700                | Targeted                |
| UTP6          | YDR449C                      | RYKILDLIISKL               | 0.611                | Targeted                |
| RML2          | YEL050C                      | VKDRPRGKDARL               | 0.073                | Targeted                |
| PXP2          | YJR111C                      | CGVSWKSGVVKL               | -1.169               | Twilight zone           |
| ATP8          | Q0080                        | RLYVSRLFISKL               | -5.777               | Twilight zone           |
| SOD2          | YHR008C                      | KEASRRFDAGKI               | -8.224               | Twilight zone           |
| MIN10         | YFR032C-B                    | PISPIGNAGSQI               | -10.522              | Not targeted            |
| DSS1          | YMR287C                      | DCLEGMLELEKL               | -16.365              | Not targeted            |
| NDE1          | YMR145C                      | AKVYFLGRDSSI               | -17.919              | Not targeted            |
| TMA19         | YKL056C                      | AIWKHGIVEEKI               | -20.006              | Not targeted            |
| EXG2          | YDR261C                      | LAITIAALCASL               | -24.671              | Not targeted            |
| CAT5          | YOR125C                      | ICRVAIWSAERI               | -32.755              | Not targeted            |

<sup>1</sup>: Each yeast ORF is assigned a systematic name in the form of a seven-character alphanumeric formula. The first three letters define the host origin (Y, for yeast), the specific chromosome and whether the ORF lies to the left (L) or right (R) of the centromere. This is followed by three digits listing the relative ORF position from the centromere. Finally, the letter W or C is inserted to indicate expression from the Watson or Crick strand of DNA.

<sup>2</sup>: Dodecamer at the extreme C-Terminus of the given protein.

<sup>3</sup> and <sup>4</sup>: The P-Score represents the bioinformatically calculated probability that the given protein sequence contains a functional PTS1. Peptides with a score higher than 0 are predicted to be **targeted** to peroxisomes, peptides with a score lower than -10 are predicted to be **not targeted**. Peptides with a score between -10 and 0 can't be predicted reliably (**Twilight zone**).

Supplementary Table 2. Yeast strains, plasmids and oligonucleotides.

Yeast strains

| Name   | Genotype                                                                                                                                                                                                                | Reference                     |
|--------|-------------------------------------------------------------------------------------------------------------------------------------------------------------------------------------------------------------------------|-------------------------------|
| BY4741 | <i>MATa his3Δ1 leu2Δ0 mei15Δ0 ura3Δ0</i>                                                                                                                                                                                | Brachmann <i>et al</i> (1998) |
| AH109  | <i>MATa, trp1-901, leu2-3, 112, ura3-52, his3-200, gal4Δ, gal80Δ, LYS2::GAL1<sub>UAS</sub>-GAL1<sub>TATA</sub>-HIS3, GAL2<sub>UAS</sub>-GAL2<sub>TATA</sub>-ADE2, URA3::MEL1<sub>UAS</sub>-MEL1<sub>TATA</sub>-lacZ</i> | Clontech                      |
| YTS398 | <i>AH109 pex5::NAT</i>                                                                                                                                                                                                  | this study                    |
| YTS72  | <i>NAT::P<sub>ADH</sub>-gfp-sps19</i>                                                                                                                                                                                   | this study                    |
| YTS123 | <i>tim50-yfp::NAT</i>                                                                                                                                                                                                   | this study                    |
| YTS129 | <i>ant1-yfp::NAT</i>                                                                                                                                                                                                    | this study                    |
| Y11866 | <i>ptc5::kanMX4</i>                                                                                                                                                                                                     | Euroscarf                     |
| Y03603 | <i>pex5::kanMX4</i>                                                                                                                                                                                                     | Euroscarf                     |
| Y11115 | <i>pex6::kanMX4</i>                                                                                                                                                                                                     | Euroscarf                     |
| Y14520 | <i>pex14::kanMX4</i>                                                                                                                                                                                                    | Euroscarf                     |
| Y10732 | <i>imp1::kanMX4</i>                                                                                                                                                                                                     | Euroscarf                     |
| Y10611 | <i>imp2::kanMX4</i>                                                                                                                                                                                                     | Euroscarf                     |
| Y14150 | <i>coq9::kanMX4</i>                                                                                                                                                                                                     | Euroscarf                     |
| YTS109 | Y03603 <i>ant1-yfp::NAT</i>                                                                                                                                                                                             | this study                    |
| YTS121 | Y10732 <i>ant1-yfp::NAT</i>                                                                                                                                                                                             | this study                    |
| YTS303 | Y11115 <i>ant1-yfp::NAT</i>                                                                                                                                                                                             | this study                    |
| YTS302 | Y14520 <i>ant1-yfp::NAT</i>                                                                                                                                                                                             | this study                    |
| YTS192 | Y10611 <i>ant1-yfp::NAT</i>                                                                                                                                                                                             | this study                    |
| YTS193 | Y14150 <i>ant1-yfp::NAT</i>                                                                                                                                                                                             | this study                    |
| YTS191 | Y10732 <i>NAT::P<sub>ADH</sub>-gfp-sps19</i>                                                                                                                                                                            | this study                    |
| YTS218 | <i>ant1-yfp::NAT ptc5-3ha::kanMX4</i>                                                                                                                                                                                   | this study                    |
| YTS221 | <i>ant1-yfp::NAT ptc5-3ha-pts::kanMX4</i>                                                                                                                                                                               | this study                    |
| YTS402 | <i>ant1-yfp::NAT ptc5-3myc-pts::kanMX4</i>                                                                                                                                                                              | this study                    |
| YTS404 | <i>ant1-yfp::NAT ptc5-3myc::kanMX4</i>                                                                                                                                                                                  | this study                    |
| YTS406 | <i>ant1-yfp::NAT imp2-3myc::kanMX4</i>                                                                                                                                                                                  | this study                    |
| YTS411 | <i>NAT::P<sub>ADH</sub>-gfp-sps19 ptc5-3ha-pts::kanMX4</i>                                                                                                                                                              | this study                    |
| YTS413 | <i>NAT::P<sub>ADH</sub>-gfp-sps19 ptc5-3ha-pts::kanMX4</i>                                                                                                                                                              | this study                    |
| YTS185 | <i>gpd1-gfp::hph</i>                                                                                                                                                                                                    | this study                    |
| YTS183 | Y11866 <i>gpd1-gfp::hph</i>                                                                                                                                                                                             | this study                    |
| YTS145 | <i>NAT::P<sub>ADH</sub>-gfp-sps19 P<sub>SEC63</sub>-sec63-mrpf-ura3::leu2</i>                                                                                                                                           | this study                    |
| YTS146 | <i>NAT::P<sub>ADH</sub>-gfp-sps19 P<sub>SEC63</sub>-sec63-mrpf-ptsPTC5-ura3::leu2</i>                                                                                                                                   | this study                    |
| YTS187 | <i>ant1-yfp::NAT tim50-cfp::kanMX4</i>                                                                                                                                                                                  | this study                    |

Plasmids

| Name    | Genotype                                                                           | Reference                   |
|---------|------------------------------------------------------------------------------------|-----------------------------|
| pCT310  | <i>HIS3 ARS/CEN P<sub>GAL1</sub>-YFP-p14<sup>D122Y</sup>-TEV<sup>234STOP</sup></i> | Renicke <i>et al</i> (2013) |
| pGBKT7  | <i>TRP1 2 μ P<sub>ADHI</sub>-GAL4-BD</i>                                           | Clontech                    |
| pGADT7  | <i>LEU2 2 μ P<sub>ADHI</sub>-NLS<sub>SV40</sub>-GAL4-AD</i>                        | Clontech                    |
| pTS72   | <i>P<sub>TEF1</sub>-PTC5-RFP-PTS in pCT310</i>                                     | this study                  |
| pTS73   | <i>P<sub>TEF1</sub>-PTC5-RFP in pCT310</i>                                         | this study                  |
| pTS97   | <i>P<sub>TEF1</sub>-PTC5<sup>1-201</sup>-RFP-HA in pCT310</i>                      | this study                  |
| pTS98   | <i>P<sub>TEF1</sub>-PTC5<sup>1-201</sup>-RFP-PTS in pCT310</i>                     | this study                  |
| pTS160  | <i>P<sub>TEF1</sub>-PTC5<sup>1-201(D84K)</sup>-RFP-HA in pCT310</i>                | this study                  |
| pTS161  | <i>P<sub>TEF1</sub>-PTC5<sup>1-201(A81-84)</sup>-RFP-HA in pCT310</i>              | this study                  |
| pTS162  | <i>P<sub>TEF1</sub>-PTC5<sup>481-84</sup>-RFP-PTS in pCT310</i>                    | this study                  |
| pTS151  | <i>P<sub>TEF1</sub>-PTC5<sup>1-80</sup>-RFP-HA in pCT310</i>                       | this study                  |
| pTS152  | <i>P<sub>TEF1</sub>-PTC5<sup>1-85</sup>-RFP-HA in pCT310</i>                       | this study                  |
| pTS153  | <i>P<sub>TEF1</sub>-PTC5<sup>1-90</sup>-RFP-HA in pCT310</i>                       | this study                  |
| pTS275  | <i>P<sub>TEF1</sub>-PTC5<sup>Δ1-83</sup>-RFP in pCT310</i>                         | this study                  |
| pTS252  | <i>P<sub>TEF1</sub>-PTC5<sup>Δ1-83</sup>-RFP-PTS in pCT310</i>                     | this study                  |
| pTS305  | <i>P<sub>TEF1</sub>-PTC5<sup>Δ1-83(D302A)</sup>-RFP in pCT310</i>                  | this study                  |
| pTS306  | <i>P<sub>TEF1</sub>-PTC5<sup>Δ1-83(D424A)</sup>-RFP in pCT310</i>                  | this study                  |
| pTS288  | <i>P<sub>TEF1</sub>-PTC5<sup>ATM</sup>-RFP in pCT310</i>                           | this study                  |
| pTS289  | <i>P<sub>TEF1</sub>-PTC5<sup>ATM</sup>-RFP-PTS in pCT310</i>                       | this study                  |
| pTS297  | <i>P<sub>TEF1</sub>-PTC5-RFP-PTS<sub>LE1</sub> in pCT310</i>                       | this study                  |
| pTS298  | <i>P<sub>TEF1</sub>-PTC5-RFP-PTS<sub>LE2</sub> in pCT310</i>                       | this study                  |
| pSM1960 | <i>URA3 2μ P<sub>SEC63</sub>-SEC63-RFP</i>                                         | Metzger <i>et al</i> (2008) |
| pTS148  | <i>URA3 2μ P<sub>SEC63</sub>-SEC63-RFP-PTS<sub>PTC5</sub></i>                      | this study                  |
| pTS295  | <i>P<sub>TEF1</sub>-PXP2-RFP in pCT310</i>                                         | this study                  |
| pTS296  | <i>P<sub>TEF1</sub>-PXP2-RFP-PTS in pCT310</i>                                     | this study                  |
| pTS309  | <i>P<sub>TEF1</sub>-MSS2-RFP in pCT310</i>                                         | this study                  |
| pTS310  | <i>P<sub>TEF1</sub>-MSS2-RFP-PTS in pCT310</i>                                     | this study                  |

| Name   | Genotype                                       | Reference  |
|--------|------------------------------------------------|------------|
| pTS311 | <i>P<sub>TEF1</sub>-RML2-RFP in pCT310</i>     | this study |
| pTS312 | <i>P<sub>TEF1</sub>-RML2-RFP-PTS in pCT310</i> | this study |
| pTS313 | <i>P<sub>TEF1</sub>-DPI8-RFP in pCT310</i>     | this study |
| pTS314 | <i>P<sub>TEF1</sub>-DPI8-RFP-PTS in pCT310</i> | this study |

### Oligonucleotides

| Name        | Sequence                                                                                                 |
|-------------|----------------------------------------------------------------------------------------------------------|
| MI801       | tgctacttcaatagttatgaaccggaggcaacaacaagccaaaatgaacttctaaataagcgaatttc                                     |
| MI802       | tataaaataaatcctctggtatatacctactcagcataagttatcgcgatgaattcgagctcg                                          |
| MJ484       | atgattacgccaagcgcgcaattaaccctcactaaagggaacaaaagctggatccccacacacatagc                                     |
| MJ485       | cttaaccgtttctttatagctacgggtctagtaaggagacatggatcctttgtaataaaacttagattagattgc                              |
| MJ221       | ttcatatgcataatctttaaattacagacattaatctaggtttggctttg                                                       |
| MJ222       | accggaggcaacaacaagccaaaacctagattaatgctgaattaatfaag                                                       |
| MJ223       | atgtaagcgtgacataactaattacatgactcaggtatattatgacctaatttag                                                  |
| MJ224       | atgtaagcgtgacataactaattacatgactcagtcataatctaggtttggctttgtgtgctcctcgggttttatgacctaatttagatg               |
| MK223       | cgaaaaaagtggggaaagtatgatattcttctccaataaatctaatcgcgatgaattcgagctcg                                        |
| MK224       | caatgaagaacctgccggacatgattgaagaattagatctacatgaagatgctacgctgcaggctgcac                                    |
| MK272       | ttacgccaagcgcgcaattaaccctcactaaagggaacaaaagctgatccccacacacatagc                                          |
| MK230       | tcctatftttggatataatatacatcaataaacaatatacataacacatgctgacgctgcaggctgcac                                    |
| MK231       | atgaatttggcagtgatcgcgagaacataaaatgctggagaacctatcaatcgcgatgaattcgagctcg                                   |
| MK365       | Atatgaaaacgttctctggggcg                                                                                  |
| MK366       | atatggcgcgcctcataacctaggctttgtttgtggttctcctcgattgactgagcagcgtaatctg                                      |
| MK386       | agcatagcaatctaactaagtttaattacaaggatccatgctcccctaactagaaccg                                               |
| MK387       | ataattcattatgcataatcttcttaattacagacataaccacatgctccatcaaaaattc                                            |
| MK388       | Atgtctgaattaatfaagaaaatagcatatg                                                                          |
| MK389       | aatgtaagcgtgacataactaattacatgactcagtcacgcataatcaggaaacatcgtatgggtaaaagattcctttatgacctaatttagatgtaaatcac  |
| MK499       | taagcgtgacataactaattacatgactcagtcataatctaggtttggctttgtgtgctcctcgggttcgcataatcaggaaacatcg                 |
| MK500       | catagcaatctaactaagtttaattacaaggatccatgatacaattaacggaataaaagattattc                                       |
| MK514       | Acaattaacggaataaaagattattctac                                                                            |
| MK515       | tagcaatctaactaagtttaattacaaggatccatgctcccctaactagaacc                                                    |
| MK529       | atgcataatctttaaattacagacatgatcttttaggggaatagtaggag                                                       |
| MK528       | tgtagaataatctttatccgtaattgttttaaggagaggatcttttaggggaatag                                                 |
| MK530       | atgcataatctttaaattacagacatgatacaaggagaggatcttttag                                                        |
| MK531       | atgcataatctttaaattacagacatgatacaaggagaggatcttttag                                                        |
| MK564       | Tccgttaattgtgatcttttaggggaatagtaggag                                                                     |
| MK565       | Ccctaaaaagatcacaaataacggaataaaagattattctac                                                               |
| MK777       | Aatctttattccgttaattgtatctgatgatagaatagctttgctctg                                                         |
| MK778       | Gatacaattaacggaataaaagattattctac                                                                         |
| MK834       | gggaggcgtgaatgtaagcgtgacataactaattacatgactcagttacaaggagctcctggcattggctccgacctgttctttatgacctaatttagatgg   |
| MK835       | gggaggcgtgaatgtaagcgtgacataactaattacatgactcagtcagagagcgtggcatttccgagagagcagcgcacacctttatgacctaatttagatgg |
| MK860       | Aaagcccttgaggctccagtgacagccacttc                                                                         |
| MK861       | Gctgactcaggacctcaaggcttaattttg                                                                           |
| MK862       | Ttcaataaacggcgaaccatcaccataaatttag                                                                       |
| MK863       | Gatgggttcggccggttattcgaattactaactaatgaag                                                                 |
| MK864       | atctaactaagtttaattacaaggatccatgacccagatacctaataatgcac                                                    |
| MK865       | Taattcagacatcaattttacaacaccagatttc                                                                       |
| MK866       | Tgtgtgaaaattgatgctgaattaatfaagaaaatagc                                                                   |
| MK867       | aagcgtgacataactaattacatgactcaggttacaattttacaacaccagatttccaactaacaccacatttatgacctaatttagatggtaaatc        |
| MK870       | atctaactaagtttaattacaaggatccatgacagaggtttgtagtaag                                                        |
| MK871       | Taattcagacataagccgtgctttgcccagc                                                                          |
| MK872       | Aaagcacgcttatgctgaattaatfaagaaaatagc                                                                     |
| MK873       | aagcgtgacataactaattacatgactcaggttacaagcgtgctttgcccagcaactttatggaatctttttatgacctaatttagatggtaaatc         |
| MK874       | Atctaactaagtttaattacaaggatccatgctgctgtagggctc                                                            |
| MK875       | Taattcagacatcaatttgcacattgctc                                                                            |
| MK876       | Gatgcaagattaatgctgaattaatfaagaaaatagc                                                                    |
| MK877       | aagcgtgacataactaattacatgactcaggttataatcttgcattttgcccctgtgctgcttttactttatgacctaatttagatggtaaatc           |
| MK878       | atctaactaagtttaattacaaggatccatgacccaaagtaccag                                                            |
| MK879       | Taattcagacatcaactttggcgcgtgagc                                                                           |
| MK880       | Gcgccaaagttgatgctgaattaatfaagaaaatagc                                                                    |
| MJ789       | acgccttatttgaggagaaaagaaaagaaagaaagattgctgaaatccaacgtacgctgcagctgcac                                     |
| MJ790       | tacacacatagatacgtatagatacagagaagggtttacatgaaaattaatcgcgatgaattcgagctcg                                   |
| MK881       | aagcgtgacataactaattacatgactcaggttacaactttggcgcgtgagccaaggtcttctggtgactttatgacctaatttagatggtaaatc         |
| ML242       | atatggcgcgcctcataacctaggctttgtttgtggttctcctcgattgactctagatgacccgtcaagtc                                  |
| ML246       | tctaactaagtttaattacaaggatccatgacataatcaacatcacatgcc                                                      |
| ML295       | Tattttcttaattaattcagacatgacataatcttctcagtttaggggtg                                                       |
| ML296       | Tattttcttaattaattcagacatgacatgacatggtataatftagg                                                          |
| Ptc5 ko for | atgtctccctaactagaaccgtagctataaagaaaacggttaagcgtacgctgcaggtcgac                                           |
| Ptc5 ko rev | aaatcctctggtatatacctcactcagcataagttatctgcaatcgcgatgaattcgagctcg                                          |
