# Supplementary material for: Peroxisomal targeting of a protein phosphatase type 2C via mitochondrial transit
Source: PubMed Central journal article supplement (PMC7217942; doi:10.1038/s41467-020-16146-3), 2020-05-12
Supplement: 41467_2020_16146_MOESM3_ESM.pdf [file 41467_2020_16146_MOESM3_ESM.pdf]

## **Description of Additional Supplementary Files**

File Name: Supplementary Data 1

Description: [Proteomics dataset](#). Available on PRIDE under accession number PXD018591.
