# Supplementary material for: Peroxisomal targeting of a protein phosphatase type 2C via mitochondrial transit
Source: PubMed Central journal article supplement (PMC7217942; doi:10.1038/s41467-020-16146-3), 2020-05-12
Supplement: 41467_2020_16146_MOESM5_ESM.pdf [file 41467_2020_16146_MOESM5_ESM.pdf]

## Reporting Summary

Nature Research wishes to improve the reproducibility of the work that we publish. This form provides structure for consistency and transparency in reporting. For further information on Nature Research policies, see [Authors & Referees](#) and the [Editorial Policy Checklist](#).

### Statistics

For all statistical analyses, confirm that the following items are present in the figure legend, table legend, main text, or Methods section.

n/a Confirmed

- |                                     |                                     |                                                                                                                                                                                                                                                            |
|-------------------------------------|-------------------------------------|------------------------------------------------------------------------------------------------------------------------------------------------------------------------------------------------------------------------------------------------------------|
| <input type="checkbox"/>            | <input checked="" type="checkbox"/> | The exact sample size ( $n$ ) for each experimental group/condition, given as a discrete number and unit of measurement                                                                                                                                    |
| <input type="checkbox"/>            | <input checked="" type="checkbox"/> | A statement on whether measurements were taken from distinct samples or whether the same sample was measured repeatedly                                                                                                                                    |
| <input type="checkbox"/>            | <input checked="" type="checkbox"/> | The statistical test(s) used AND whether they are one- or two-sided<br><i>Only common tests should be described solely by name; describe more complex techniques in the Methods section.</i>                                                               |
| <input checked="" type="checkbox"/> | <input type="checkbox"/>            | A description of all covariates tested                                                                                                                                                                                                                     |
| <input checked="" type="checkbox"/> | <input type="checkbox"/>            | A description of any assumptions or corrections, such as tests of normality and adjustment for multiple comparisons                                                                                                                                        |
| <input type="checkbox"/>            | <input checked="" type="checkbox"/> | A full description of the statistical parameters including central tendency (e.g. means) or other basic estimates (e.g. regression coefficient) AND variation (e.g. standard deviation) or associated estimates of uncertainty (e.g. confidence intervals) |
| <input type="checkbox"/>            | <input checked="" type="checkbox"/> | For null hypothesis testing, the test statistic (e.g. $F$ , $t$ , $r$ ) with confidence intervals, effect sizes, degrees of freedom and $P$ value noted<br><i>Give <math>P</math> values as exact values whenever suitable.</i>                            |
| <input checked="" type="checkbox"/> | <input type="checkbox"/>            | For Bayesian analysis, information on the choice of priors and Markov chain Monte Carlo settings                                                                                                                                                           |
| <input checked="" type="checkbox"/> | <input type="checkbox"/>            | For hierarchical and complex designs, identification of the appropriate level for tests and full reporting of outcomes                                                                                                                                     |
| <input type="checkbox"/>            | <input checked="" type="checkbox"/> | Estimates of effect sizes (e.g. Cohen's $d$ , Pearson's $r$ ), indicating how they were calculated                                                                                                                                                         |

*Our web collection on [statistics for biologists](#) contains articles on many of the points above.*

### Software and code

Policy information about [availability of computer code](#)

Data collection

Image acquisition was performed using Volocity 5.5.2.  
Chemiluminescence was recorded using ChemoStar Imager

Data analysis

Plots were generated using RStudio 1.2.1335 with R 3.6.0.  
Image analysis and deconvolution was performed using ImageJ 1.52a.  
Data was arranged and stored using Microsoft Excel 2016  
MS/MS data analysis was performed using Mascot embedded in Proteom Discover 1.4.  
FASTA files were analyzed using notepad++ 7.8.4.  
Prediction of PTS1 was performed using PTS-Predictor (<http://mendel.imp.ac.at/pts1/>), Neuberger et al (2003).

For manuscripts utilizing custom algorithms or software that are central to the research but not yet described in published literature, software must be made available to editors/reviewers. We strongly encourage code deposition in a community repository (e.g. GitHub). See the Nature Research [guidelines for submitting code & software](#) for further information.

### Data

Policy information about [availability of data](#)

All manuscripts must include a [data availability statement](#). This statement should provide the following information, where applicable:

- Accession codes, unique identifiers, or web links for publicly available datasets
- A list of figures that have associated raw data
- A description of any restrictions on data availability

Non-cropped western blots and data underlying all plots are provided as Source Data file. Any other original data to support findings of this study are available from the authors on request.

## Field-specific reporting

Please select the one below that is the best fit for your research. If you are not sure, read the appropriate sections before making your selection.

- Life sciences     Behavioural & social sciences     Ecological, evolutionary & environmental sciences

For a reference copy of the document with all sections, see [nature.com/documents/nr-reporting-summary-flat.pdf](https://www.nature.com/documents/nr-reporting-summary-flat.pdf)

## Life sciences study design

All studies must disclose on these points even when the disclosure is negative.

|                 |                                                                                                                                                                                                                                                                                                                                                                                                                                                                                                                                                                                                                                                                                                                                                                                                                                                                                                                                                                   |
|-----------------|-------------------------------------------------------------------------------------------------------------------------------------------------------------------------------------------------------------------------------------------------------------------------------------------------------------------------------------------------------------------------------------------------------------------------------------------------------------------------------------------------------------------------------------------------------------------------------------------------------------------------------------------------------------------------------------------------------------------------------------------------------------------------------------------------------------------------------------------------------------------------------------------------------------------------------------------------------------------|
| Sample size     | Microscopic data was collected from three independent <i>S. cerevisiae</i> cultures. Five images per culture were quantified. Plots are described in more detail in the methods section. P-values were calculated using an two-tailed unpaired Student's t-test. Pearson's correlation coefficient was calculated with Volocity 5.5.2. For calculation of pearson's correlation coefficients all analyzed images contained ten or more cells and one image represents one data point. For quantification of contacts between mitochondria and peroxisomes 5 cells per image per strain from three independent experiments were analyzed. Quantification was performed by manual inspection of cells showing a signal in the RFP channel. Inspection was carried out without knowledge of the respective genotypes. Sample size was not predetermined. We always made efforts to investigate a large number of cells, which is possible for <i>S. cerevisiae</i> . |
| Data exclusions | No data were excluded.                                                                                                                                                                                                                                                                                                                                                                                                                                                                                                                                                                                                                                                                                                                                                                                                                                                                                                                                            |
| Replication     | Unless stated otherwise, all experiments were repeated at least three times. All attempts were successful.                                                                                                                                                                                                                                                                                                                                                                                                                                                                                                                                                                                                                                                                                                                                                                                                                                                        |
| Randomization   | Yeast strains were imaged in random order for all datasets.                                                                                                                                                                                                                                                                                                                                                                                                                                                                                                                                                                                                                                                                                                                                                                                                                                                                                                       |
| Blinding        | Quantification of microscopic datasets was performed without knowledge of the respective genotypes of the imaged strains.                                                                                                                                                                                                                                                                                                                                                                                                                                                                                                                                                                                                                                                                                                                                                                                                                                         |

## Reporting for specific materials, systems and methods

We require information from authors about some types of materials, experimental systems and methods used in many studies. Here, indicate whether each material, system or method listed is relevant to your study. If you are not sure if a list item applies to your research, read the appropriate section before selecting a response.

### Materials & experimental systems

| n/a                                 | Involved in the study                                |
|-------------------------------------|------------------------------------------------------|
| <input type="checkbox"/>            | <input checked="" type="checkbox"/> Antibodies       |
| <input checked="" type="checkbox"/> | <input type="checkbox"/> Eukaryotic cell lines       |
| <input checked="" type="checkbox"/> | <input type="checkbox"/> Palaeontology               |
| <input checked="" type="checkbox"/> | <input type="checkbox"/> Animals and other organisms |
| <input checked="" type="checkbox"/> | <input type="checkbox"/> Human research participants |
| <input checked="" type="checkbox"/> | <input type="checkbox"/> Clinical data               |

### Methods

| n/a                                 | Involved in the study                           |
|-------------------------------------|-------------------------------------------------|
| <input checked="" type="checkbox"/> | <input type="checkbox"/> ChIP-seq               |
| <input checked="" type="checkbox"/> | <input type="checkbox"/> Flow cytometry         |
| <input checked="" type="checkbox"/> | <input type="checkbox"/> MRI-based neuroimaging |

## Antibodies

### Antibodies used

Primary antibodies:  
 anti-GFP (1:5.000 (WB), 1:500 (IF), TP401, Torrey Pines Biolabs)  
 anti-HA (1:2.500 (WB), ab1302275, Abcam)  
 anti-tagRFP (1:1.000 (WB), AB233, Evrogen)  
 anti-Myc (1:1000 (WB), 1:250 (IF), #2276, Cell Signaling Technology)  
 rabbit anti-Por1 (1:1000 (WB), provided by Prof. Roland Lill (University of Marburg)  
 Secondary antibodies:  
 m-IgGkBP-HRP (1:5.000, sc-516102, Santa Cruz Biotechnology)  
 mouse anti-rabbit IgG-HRP (1:5.000, sc-2357, Santa Cruz Biotechnology)  
 Alexa Fluor 488 AffiniPure Donkey anti-rabbit (1:200, 711-545-152, Jackson ImmunoResearch)  
 Alexa Fluor 594 AffiniPure Donkey anti-mouse (1:200, 715-585-150, Jackson ImmunoResearch)

### Validation

Primary antibodies:  
 anti-GFP (1:5.000 (WB), 1:500 (IF), TP401, Torrey Pines Biolabs), Manufacturer's data sheet.  
 anti-HA (1:2.500 (WB), ab1302275, Abcam), Manufacturer's data sheet.  
 anti-tagRFP (1:1.000 (WB), AB233, Evrogen), Manufacturer's data sheet.  
 anti-Myc (1:1000 (WB), 1:250 (IF), #2276, Cell Signaling Technology), Manufacturer's data sheet.

rabbit anti-Por1 (1:1000 (WB), provided by Prof. Roland Lill (University of Marburg), Künkele et al., 1998; works similar as anti-VDAC1/Por1 antibody (ab110326, Abcam)
